# Supplementary material
Source: Research Square preprint supplement (doi:10.21203/rs.3.rs-9069155/v1)
Supplement: Supplementary file 1 [file 76faba370aa804fc08a06f38.docx]

**Supplementary Table 1. Maternal and neonatal characteristics by uterotonic agent use (variables not included in the main analysis)**

| Group | Total  (n=2397) | Carbetocin (n=1236) | Carbetocin & Methylergometrine &Oxytocin (n=335) | Carbetocin  &Oxytocin  (n=297) | Methylergometrine &Oxytocin (n=106) | Oxytocin  (n=93) | No uterotonic agents (n=330) | p-value |
| --- | --- | --- | --- | --- | --- | --- | --- | --- |
| Natural conception, n(%) | 2035 (84.9) | 1060 (85.8) | 272 (81.2) | 256 (86.2) | 92 (86.8) | 76 (81.7) | 279 (84.5) | 0.331 |
| Ovulation induction, n(%) | 55 (2.3) | 25 (2.0) | 9 (2.7) | 12 (4.0) | 3 (2.8) | 2 (2.2) | 4 (1.2) | 0.257 |
| Intrauterine insemination, n(%) | 38 (1.6) | 13 (1.1) | 6 (1.8) | 7 (2.4) | 4 (3.8) | 2 (2.2) | 6 (1.8) | 0.218 |
| In vitro fertilization, n(%) | 296 (12.3) | 149 (12.1) | 51 (15.2) | 31 (10.4) | 9 (8.5) | 15 (16.1) | 41 (12.4) | 0.274 |
| Gestational diabetes  mellitus, n(%) | 161 (6.7) | 81 (6.6) | 23 (6.9) | 25 (8.4) | 4 (3.8) | 8 (8.6) | 20 (6.1) | 0.6 |
| Delivery_method, n(%) |  |  |  |  |  |  |  | <0.001 |
| Vaginal delivery | 1475 (61.5) | 793 (64.2) | 280 (83.6) | 194 (65.3) | 55 (51.9) | 41 (44.1) | 112 (33.9) |  |
| Operative vaginal  delivery (vacuum-assisted) | 367 (15.3) | 261 (21.1) | 12 (3.6) | 48 (16.2) | 28 (26.4) | 6 (6.5) | 12 (3.6) |  |
| Cesarean delivery | 555 (23.2) | 182 (14.7) | 43 (12.8) | 55 (18.5) | 23 (21.7) | 46 (49.5) | 206 (62.4) |  |
| Induction of labor, n(%) | 1831 (76.4) | 977 (79.0) | 183 (54.6) | 242 (81.5) | 90 (84.9) | 66 (71.0) | 273 (82.7) | <0.001 |
| Prostaglandin E2 for induction, n(%) | 1093 (45.6) | 580 (46.9) | 98 (29.3) | 148 (49.8) | 56 (52.8) | 37 (39.8) | 174 (52.7) | <0.001 |
| Oxytocin use for induction, n(%) | 1572 (65.6) | 751 (60.8) | 260 (77.6) | 223 (75.1) | 86 (81.1) | 61 (65.6) | 191 (57.9) | <0.001 |
| Perineal laceration, n(%) | 311 (13.0) | 103 (8.3) | 29 (8.7) | 133 (44.8) | 7 (6.6) | 13 (14.0) | 26 (7.9) | <0.001 |
| Neonatal sex, n(%) |  |  |  |  |  |  |  | 0.356 |
| Male | 1185 (49.4) | 613 (49.6) | 174 (51.9) | 140 (47.1) | 46 (43.4) | 40 (43.0) | 172 (52.1) |  |
| Female | 1212 (50.6) | 623 (50.4) | 161 (48.1) | 157 (52.9) | 60 (56.6) | 53 (57.0) | 158 (47.9) |  |
| Apgar score at 1 minute | 8.6 (1.0) | 8.6 (0.9) | 8.7 (0.9) | 8.5 (1.1) | 8.3 (1.0) | 8.7 (0.9) | 8.5 (1.0) | <0.001 |
| Apgar score at 5 minutes | 9.6 (0.6) | 9.6 (0.6) | 9.7 (0.6) | 9.6 (0.6) | 9.3 (0.7) | 9.5 (0.8) | 9.4 (0.6) | <0.001 |
| ART, Assisted reproductive Technology; PROM, Prelabor rupture of Membranes; Continuous variables are presented as mean ± standard deviation, and categorical variables as number (percentage). | | | | | | | | |

**Supplementary Table 2. Primary postpartum hemorrhage outcomes according to uterotonic regimen (Carbetocin only vs Oxytocin only vs no uterotonic agent)**

| Group | Carbetocin only | Oxytocin only | No uterotonic agents | p-value |
| --- | --- | --- | --- | --- |
| Number of cases (n) | n=1205 | n=91 | n=319 |  |
| Hemoglobin drop ≥ 2 g/dL, n(%) | 265 (22.0) | 34 (37.4) | 92 (28.8) | <0.001 |
| Hemoglobin drop ≥ 4 g/dL, n(%) | 13 (1.1) | 4 (4.4) | 6 (1.9) | 0.027 |
|  |  |  |  |  |
| Number of cases (n) | n=1236 | n=93 | n=330 |  |
| Any blood transfusion, n(%) | 24 (1.9) | 4 (4.3) | 10 (3.0) | 0.206 |
| Red blood cell transfusion, n(%) | 23 (1.9) | 4 (4.3) | 10 (3.0) | 0.168 |
| Fresh frozen plasma transfusion, n(%) | 9 (0.7) | 0 (0.0) | 5 (1.5) | 0.251 |
| Platelet concentrate transfusion, n(%) | 1 (0.1) | 0 (0.0) | 3 (0.9) | 0.064 |
| Cryoprecipitate transfusion, n(%) | 0 (0.0) | 0 (0.0) | 0 (0.0) | NA |
| RBC transfusion ≥ 4 units, n(%) | 5 (0.4) | 0 (0.0) | 3 (0.9) | 0.500 |
| Intrauterine balloon tamponade, n(%) | 5 (0.4) | 0 (0.0) | 0 (0.0) | 0.693 |
| Uterine artery embolization, n(%) | 2 (0.2) | 0 (0.0) | 0 (0.0) | 1.000 |
| Categorical variables were compared using the chi-square test or Fisher’s exact test, as appropriate, depending on expected cell counts. The number of cases varies by outcome due to missing data; outcomes are presented according to the corresponding denominators. | | | | |

**Supplementary Table 3. Primary postpartum hemorrhage outcomes according to uterotonic regimen (Carbetocin only vs Carbetocin & additional agents)**

| Group | Carbetocin only | Carbetocin & additional agents | p-value |
| --- | --- | --- | --- |
| Number of cases (n) | n=1205 | n=632 |  |
| Hemoglobin drop ≥ 2 g/dL, n(%) | 265 (22.0) | 166 (26.3) | 0.046 |
| Hemoglobin drop ≥ 4 g/dL, n(%) | 13 (1.1) | 6 (0.9) | 0.986 |
|  |  |  |  |
| Number of cases (n) | n=1236 | n=632 |  |
| Any blood transfusion, n(%) | 24 (1.9) | 14 (2.2) | 0.824 |
| Red blood cell transfusion, n(%) | 23 (1.9) | 14 (2.2) | 0.730 |
| Fresh frozen plasma transfusion, n(%) | 9 (0.7) | 2 (0.3) | 0.352 |
| Platelet concentrate transfusion, n(%) | 1 (0.1) | 0 (0.0) | 1.000 |
| Cryoprecipitate transfusion, n(%) | 0 (0.0) | 0 (0.0) | NA |
| RBC transfusion ≥ 4 units, n(%) | 5 (0.4) | 1 (0.2) | 0.670 |
| Intrauterine balloon tamponade, n(%) | 5 (0.4) | 3 (0.5) | 1.000 |
| Uterine artery embolization, n(%) | 2 (0.2) | 1 (0.2) | 1.000 |
| Categorical variables were compared using the chi-square test or Fisher’s exact test, as appropriate, depending on expected cell counts. The number of cases varies by outcome due to missing data; outcomes are presented according to the corresponding denominators. | | | |

**Supplementary Table 4. Primary postpartum hemorrhage outcomes according to uterotonic regimen (Carbetocin only vs Methylergometrine &Oxytocin)**

| Group | Carbetocin only | Methylergometrine &Oxytocin | p-value |
| --- | --- | --- | --- |
| Number of cases (n) | n=1205 | n=104 |  |
| Hemoglobin drop ≥ 2 g/dL, n(%) | 265 (22.0) | 18 (17.3) | 0.323 |
| Hemoglobin drop ≥ 4 g/dL, n(%) | 13 (1.1) | 1 (1.0) | 1.000 |
|  |  |  |  |
| Number of cases (n) | n=1236 | n=106 |  |
| Any blood transfusion, n(%) | 24 (1.9) | 5 (4.7) | 0.124 |
| Red blood cell transfusion, n(%) | 23 (1.9) | 5 (4.7) | 0.105 |
| Fresh frozen plasma transfusion, n(%) | 9 (0.7) | 1 (0.9) | 0.562 |
| Platelet concentrate transfusion, n(%) | 1 (0.1) | 0 (0.0) | 1.000 |
| Cryoprecipitate transfusion, n(%) | 0 (0.0) | 0 (0.0) | NA |
| RBC transfusion ≥ 4 units, n(%) | 5 (0.4) | 1 (0.9) | 0.390 |
| Intrauterine balloon tamponade, n(%) | 5 (0.4) | 2 (1.9) | 0.100 |
| Uterine artery embolization, n(%) | 2 (0.2) | 2 (1.9) | 0.033 |
| Categorical variables were compared using the chi-square test or Fisher’s exact test, as appropriate, depending on expected cell counts. The number of cases varies by outcome due to missing data; outcomes are presented according to the corresponding denominators. | | | |

**Supplementary Table 5. Maternal and neonatal characteristics by uterotonic agent use in the vaginal delivery group**

| Group | Carbetocin (n=1054) | Carbetocin & Methylergometrine &Oxytocin (n=292) | Carbetocin  &Oxytocin  (n=242) | Methylergometrine &Oxytocin (n=83) | Oxytocin  (n=47) | No uterotonic agents (n=124) | p-value |
| --- | --- | --- | --- | --- | --- | --- | --- |
| Maternal age, years | 33.8 (3.5) | 33.3 (3.7) | 33.8 (3.3) | 33.7 (4.0) | 34.0 (4.8) | 33.9 (4.2) | 0.374 |
| Prepregnancy height, cm | 163.2 (5.3) | 162.8 (5.3) | 162.4 (5.1) | 162.8 (5.5) | 162.3 (4.6) | 161.5 (5.1) | 0.010 |
| Prepregnancy weight, kg | 58.1 (9.3) | 58.0 (9.5) | 57.1 (10.6) | 55.6 (7.1) | 57.2 (8.2) | 55.6 (8.8) | 0.018 |
| Parity, n(%) |  |  |  |  |  |  | 0.080 |
| Nulliparity | 629 (59.7) | 194 (66.4) | 139 (57.4) | 53 (63.9) | 32 (68.1) | 85 (68.5) |  |
| Primi/multiparity | 425 (40.3) | 98 (33.6) | 103 (42.6) | 30 (36.1) | 15 (31.9) | 39 (31.5) |  |
| Natural conception, n(%) | 922 (87.5) | 238 (81.5) | 212 (87.6) | 73 (88.0) | 39 (83.0) | 108 (87.1) | 0.157 |
| Ovulation induction, n(%) | 21 (2.0) | 8 (2.7) | 9 (3.7) | 3 (3.6) | 1 (2.1) | 3 (2.4) | 0.676 |
| Intrauterine insemination, n(%) | 11 (1.0) | 6 (2.1) | 6 (2.5) | 3 (3.6) | 1 (2.1) | 1 (0.8) | 0.251 |
| In vitro fertilization, n(%) | 110 (10.4) | 43 (14.7) | 21 (8.7) | 5 (6.0) | 7 (14.9) | 12 (9.7) | 0.112 |
| PROM, n(%) | 32 (3.0) | 5 (1.7) | 24 (9.9) | 3 (3.6) | 1 (2.1) | 11 (8.9) | <0.001 |
| Gestational hypertension, n(%) | 2 (0.2) | 0 (0.0) | 6 (2.0) | 0 (0.0) | 1 (1.1) | 4 (1.2) | 0.001 |
| Preeclampsia, n(%) | 6 (0.5) | 0 (0.0) | 7 (2.4) | 0 (0.0) | 1 (1.1) | 0 (0.0) | 0.001 |
| Gestational diabetes mellitus, n(%) | 2 (0.2) | 0 (0.0) | 5 (2.1) | 0 (0.0) | 1 (2.1) | 1 (0.8) | 0.002 |
| Delivery_method, n(%) |  |  |  |  |  |  | <0.001 |
| Vaginal delivery | 793 (75.2) | 280 (95.9) | 194 (80.2) | 55 (66.3) | 41 (87.2) | 112 (90.3) |  |
| Operative vaginal delivery  (vacuum-assisted) | 261 (24.8) | 12 (4.1) | 48 (19.8) | 28 (33.7) | 6 (12.8) | 12 (9.7) |  |
| Induction of labor, n(%) | 828 (78.6) | 142 (48.6) | 202 (83.5) | 70 (84.3) | 27 (57.4) | 87 (70.2) | <0.001 |
| Prostaglandin E2 for induction, n(%) | 498 (47.2) | 72 (24.7) | 122 (50.4) | 40 (48.2) | 14 (29.8) | 23 (18.5) | <0.001 |
| Oxytocin use for induction, n(%) | 655 (62.1) | 219 (75.0) | 186 (76.9) | 73 (88.0) | 27 (57.4) | 93 (75.0) | <0.001 |
| Perineal laceration, n(%) | 103 (9.8) | 29 (9.9) | 133 (55.0) | 7 (8.4) | 13 (27.7) | 26 (21.0) | <0.001 |
| Gestational age at delivery, weeks | 39.0 [38.0, 39.0] | 39.0 [38.0, 40.0] | 39.0 [38.0, 39.0] | 39.0 [38.0, 39.0] | 39.0 [38.0, 39.0] | 38.0 [38.0, 39.0] | <0.001 |
| Birth weight, g | 3166.7 (338.9) | 3207.9 (347.6) | 3130.2 (362.3) | 3099.3 (326.6) | 3083.9 (400.3) | 3108.0 (336.7) | 0.008 |
| Neonatal sex, n(%) |  |  |  |  |  |  | 0.658 |
| Male | 525 (49.8) | 151 (51.7) | 114 (47.1) | 36 (43.4) | 20 (42.6) | 61 (49.2) |  |
| Female | 529 (50.2) | 141 (48.3) | 128 (52.9) | 47 (56.6) | 27 (57.4) | 63 (50.8) |  |
| Apgar score at 1 minute | 9.0 [8.0, 9.0] | 9.0 [9.0, 9.0] | 9.0 [8.0, 9.0] | 8.0 [8.0, 9.0] | 9.0 [8.0, 9.5] | 9.00 [8.0, 9.0] | <0.001 |
| Apgar score at 5 minutes | 10.0 [9.0, 10.0] | 10.0 [10.0, 10.0] | 10.0 [9.0, 10.0] | 9.00 [9.0, 10.0] | 10.0 [9.0, 10.0] | 10.0 [9.0, 10.0] | <0.001 |
| PROM, Prelabor rupture of Membranes; Continuous variables are expressed as mean (SD) or median (IQR), depending on data distribution.and categorical variables as number (percentage). | | | | | | | |
